# Supplementary material for: Marketable Pollution Permits in Oligopolistic Markets with Transaction Costs
Source: Atypon-hosted journal article supplement (doi:10.1287/opre.48.3.424.12429), 2000-06-01
Supplement: opre.48.3.424.12429-sm_nagurneydhanda.pdf [file opre.48.3.424.12429-sm_nagurneydhanda.pdf]

Online Companion for

**“Marketable Pollution Permits in Oligopolistic Markets with  
Transaction Costs”**

*Operations Research*

Vol. 48, No. 3

May-June 2000

**Anna Nagurney**

Department of Finance and Operations Management  
School of Management  
University of Massachusetts  
Amherst, Massachusetts

**Kanwalroop Kathy Dhanda**

School of Business Administration  
University of Portland  
Portland, Oregon

©2000

**informs**

Table 1: **Example 1 - Input Data**

**Production cost parameters**

| Firm $i$ | $c_{i1}$ | $c_{i2}$ | $K_{i1}$ | $K_{i2}$ | $\beta_{i1}$ | $\beta_{i2}$ |
|----------|----------|----------|----------|----------|--------------|--------------|
| 1        | 2.       | 5.       | 5.       | 4.       | 1.2          | 1.9          |
| 2        | 6.       | 7.       | 3.       | 6.       | 1.9          | 1.8          |

**Emission cost parameters**

| Firm $i$ | $g1_{i1}$ | $g1_{i2}$ | $g2_{i1}$ | $g2_{i2}$ | $g3_{i1}$ | $g3_{i2}$ | $g4_{i1}$ | $g4_{i2}$ |
|----------|-----------|-----------|-----------|-----------|-----------|-----------|-----------|-----------|
| 1        | 1.4       | 1.8       | -10.      | -20.      | 1.5       | 1.5       | 10.       | 14.       |
| 2        | 1.4       | 2.7       | -15.      | -5.       | 3.5       | 2.5       | 5.        | 15.       |

**Transaction cost parameters**

| Firm $i$ | $\phi1_{i11}$ | $\phi1_{i12}$ | $\phi1_{i21}$ | $\phi1_{i22}$ | $\phi2_{i11}$ | $\phi2_{i12}$ |
|----------|---------------|---------------|---------------|---------------|---------------|---------------|
| 1        | 0.09          | 0.05          | 0.05          | 0.01          | -7.           | -8.           |
| 2        | 0.03          | 0.04          | 0.09          | 0.05          | -8.           | -7.           |

| Firm $i$ | $\phi2_{i21}$ | $\phi2_{i22}$ | $\alpha_{i11}$ | $\alpha_{i12}$ | $\alpha_{i21}$ | $\alpha_{i22}$ |
|----------|---------------|---------------|----------------|----------------|----------------|----------------|
| 1        | -1.           | -5.           | 0.004          | 0.009          | 0.005          | 0.005          |
| 2        | -5.           | -8.           | 0.002          | 0.006          | 0.003          | 0.006          |

Appendices for Nagurney and Dhanda  
**Marketable Pollution Permits in Oligopolistic  
Markets with Transaction Costs**

Table 2: Example 1 - Output Data

**Equilibrium production and emission vectors**

| Firm $i$ | $q_{i1}^*$ | $q_{i2}^*$ | $e_i^{1*}$ | $e_i^{2*}$ |
|----------|------------|------------|------------|------------|
| 1        | 75.710     | 86.970     | 0.516      | 1.165      |
| 2        | 66.547     | 72.257     | 5.371      | 0.017      |

**Equilibrium license and marginal abatement cost vectors**

| Firm $i$ | $l_{i1}^{1*}$ | $l_{i1}^{2*}$ | $l_{i2}^{1*}$ | $l_{i2}^{2*}$ |
|----------|---------------|---------------|---------------|---------------|
| 1        | 0.257         | 5.831         | 1.291         | 5.831         |
| 2        | 5.734         | 0.169         | 4.709         | 0.169         |

| Firm $i$ | $\lambda_{i1}^{1*}$ | $\lambda_{i1}^{2*}$ | $\lambda_{i2}^{1*}$ | $\lambda_{i2}^{2*}$ |
|----------|---------------------|---------------------|---------------------|---------------------|
| 1        | 0.700               | 0.061               | 3.282               | 3.100               |
| 2        | 0.000               | 0.491               | 0.000               | 0.000               |

**Equilibrium price vector**

| Receptor Point $j$ | $p_j^{1*}$ | $p_j^{2*}$ |
|--------------------|------------|------------|
| 1                  | 7.654      | 7.477      |
| 2                  | 4.153      | 7.983      |

**New equilibrium price vector**

| Receptor Point $j$ | $p_j^{1*}$ | $p_j^{2*}$ |
|--------------------|------------|------------|
| 1                  | 6.415      | 6.708      |
| 2                  | 2.230      | 7.127      |

Table 3: **Example 2 - Input Data**

**Production cost parameters**

| Firm $i$ | $c_{i1}$ | $c_{i2}$ | $K_{i1}$ | $K_{i2}$ | $\beta_{i1}$ | $\beta_{i2}$ |
|----------|----------|----------|----------|----------|--------------|--------------|
| 1        | 2.       | 5.       | 5.       | 4.       | 1.2          | 1.9          |
| 2        | 6.       | 7.       | 3.       | 6.       | 1.9          | 1.8          |
| 3        | 4.9      | 6.4      | 2        | 4        | 2.5          | 2.1          |

**Emission cost parameters**

| Firm $i$ | $g1_{i1}$ | $g1_{i2}$ | $g2_{i1}$ | $g2_{i2}$ | $g3_{i1}$ | $g3_{i2}$ | $g4_{i1}$ | $g4_{i2}$ |
|----------|-----------|-----------|-----------|-----------|-----------|-----------|-----------|-----------|
| 1        | 1.4       | 1.8       | -10.      | -20.      | 1.5       | 1.5       | 10.       | 14.       |
| 2        | 1.4       | 2.7       | -15.      | -5.       | 3.5       | 2.5       | 5.        | 15.       |
| 3        | 1.7       | 2.3       | -5.       | -10.      | 4.1       | 3.1       | 6.        | 2.        |

**Transaction cost parameters**

| Firm $i$ | $\phi1_{i11}$ | $\phi1_{i12}$ | $\phi1_{i21}$ | $\phi1_{i22}$ | $\phi2_{i11}$ | $\phi2_{i12}$ |
|----------|---------------|---------------|---------------|---------------|---------------|---------------|
| 1        | 0.09          | 0.05          | 0.05          | 0.01          | -7.           | -8.           |
| 2        | 0.03          | 0.04          | 0.09          | 0.05          | -8.           | -7.           |
| 3        | 0.07          | 0.04          | 0.03          | 0.06          | -5.           | -1.           |

| Firm $i$ | $\phi2_{i21}$ | $\phi2_{i22}$ | $\alpha_{i11}$ | $\alpha_{i12}$ | $\alpha_{i21}$ | $\alpha_{i22}$ |
|----------|---------------|---------------|----------------|----------------|----------------|----------------|
| 1        | -1.           | -5.           | 0.004          | 0.009          | 0.005          | 0.005          |
| 2        | -5.           | -8.           | 0.002          | 0.006          | 0.003          | 0.006          |
| 3        | -8.           | -3.           | 0.004          | 0.007          | 0.006          | 0.009          |

Table 4: **Example 2 - Output Data**

**Equilibrium production and emission vectors**

| Firm $i$ | $q_{i1}^*$ | $q_{i2}^*$ | $e_i^{1*}$ | $e_i^{2*}$ |
|----------|------------|------------|------------|------------|
| 1        | 71.768     | 83.491     | 0.000      | 1.440      |
| 2        | 55.597     | 61.956     | 4.815      | 0.171      |
| 3        | 67.693     | 61.693     | 0.340      | 0.000      |

**Equilibrium license and marginal abatement cost vectors**

| Firm $i$ | $l_{i1}^{1*}$ | $l_{i1}^{2*}$ | $l_{i2}^{1*}$ | $l_{i2}^{2*}$ |
|----------|---------------|---------------|---------------|---------------|
| 1        | 0.000         | 7.290         | 0.000         | 7.196         |
| 2        | 8.490         | 1.170         | 2.408         | 1.804         |
| 3        | 0.510         | 0.000         | 6.592         | 0.000         |

| Firm $i$ | $\lambda_{i1}^{1*}$ | $\lambda_{i1}^{2*}$ | $\lambda_{i2}^{1*}$ | $\lambda_{i2}^{2*}$ |
|----------|---------------------|---------------------|---------------------|---------------------|
| 1        | 0.000               | 0.000               | 4.151               | 2.964               |
| 2        | 0.000               | 0.408               | 3.037               | 0.000               |
| 3        | 2.562               | 1.852               | 0.000               | 0.000               |

**Equilibrium price vector**

| Receptor Point $j$ | $p_j^{1*}$ | $p_j^{2*}$ |
|--------------------|------------|------------|
| 1                  | 7.491      | 7.271      |
| 2                  | 7.604      | 7.820      |

Table 5: **Example 3 - Input Data**

**Production cost parameters**

| Firm $i$ | $c_{i1}$ | $c_{i2}$ | $K_{i1}$ | $K_{i2}$ | $\beta_{i1}$ | $\beta_{i2}$ |
|----------|----------|----------|----------|----------|--------------|--------------|
| 1        | 2.       | 5.       | 5.       | 4.       | 1.2          | 1.9          |
| 2        | 6.       | 7.       | 3.       | 6.       | 1.9          | 1.8          |
| 3        | 4.9      | 6.4      | 2        | 4        | 2.5          | 2.1          |

**Emission cost parameters**

| Firm $i$ | $g1_{i1}$ | $g1_{i2}$ | $g2_{i1}$ | $g2_{i2}$ | $g3_{i1}$ | $g3_{i2}$ | $g4_{i1}$ | $g4_{i2}$ |
|----------|-----------|-----------|-----------|-----------|-----------|-----------|-----------|-----------|
| 1        | 1.4       | 1.8       | -10.      | -20.      | 1.5       | 1.5       | 10.       | 14.       |
| 2        | 1.4       | 2.7       | -15.      | -5.       | 3.5       | 2.5       | 5.        | 15.       |
| 3        | 1.7       | 2.3       | -5.       | -10.      | 4.1       | 3.1       | 6.        | 2.        |

**Transaction cost parameters**

| Firm $i$ | $\phi1_{i11}$ | $\phi1_{i12}$ | $\phi1_{i21}$ | $\phi1_{i22}$ | $\phi1_{i31}$ | $\phi1_{i32}$ |
|----------|---------------|---------------|---------------|---------------|---------------|---------------|
| 1        | 0.09          | 0.05          | 0.05          | 0.01          | 0.08          | 0.02          |
| 2        | 0.03          | 0.04          | 0.09          | 0.05          | 0.07          | 0.09          |
| 3        | 0.07          | 0.04          | 0.03          | 0.06          | 0.03          | 0.08          |

| Firm $i$ | $\phi2_{i11}$ | $\phi2_{i12}$ | $\phi2_{i21}$ | $\phi2_{i22}$ | $\phi2_{i31}$ | $\phi2_{i32}$ |
|----------|---------------|---------------|---------------|---------------|---------------|---------------|
| 1        | -7.           | -8.           | -1.           | -5.           | -2.           | -5.           |
| 2        | -8.           | -7.           | -5.           | -8.           | -6.           | -5.           |
| 3        | -5.           | -1.           | -8.           | -3.           | -4.           | -5.           |

Table 6: **Example 3 - Output Data**

**Equilibrium production and emission vectors**

| Firm $i$ | $q_{i1}^*$ | $q_{i2}^*$ | $e_i^{1*}$ | $e_i^{2*}$ |
|----------|------------|------------|------------|------------|
| 1        | 71.768     | 83.498     | 0.000      | 1.440      |
| 2        | 55.595     | 61.953     | 2.699      | 0.171      |
| 3        | 67.514     | 61.688     | 0.008      | 0.000      |

**Equilibrium license and marginal abatement cost vectors**

| Firm $i$ | $l_{i1}^{1*}$ | $l_{i1}^{2*}$ | $l_{i2}^{1*}$ | $l_{i2}^{2*}$ | $l_{i3}^{1*}$ | $l_{i3}^{2*}$ |
|----------|---------------|---------------|---------------|---------------|---------------|---------------|
| 1        | 0.000         | 7.291         | 0.000         | 7.197         | 0.000         | 6.111         |
| 2        | 8.987         | 1.709         | 1.349         | 1.803         | 8.997         | 1.360         |
| 3        | 0.013         | 0.000         | 7.652         | 0.000         | 0.003         | 1.530         |

| Firm $i$ | $\lambda_{i1}^{1*}$ | $\lambda_{i1}^{2*}$ | $\lambda_{i2}^{1*}$ | $\lambda_{i2}^{2*}$ | $\lambda_{i3}^{1*}$ | $\lambda_{i3}^{2*}$ |
|----------|---------------------|---------------------|---------------------|---------------------|---------------------|---------------------|
| 1        | 0.000               | 0.000               | 3.198               | 2.964               | 1.659               | 0.000               |
| 2        | 0.000               | 0.408               | 2.782               | 0.000               | 1.815               | 0.000               |
| 3        | 2.462               | 1.499               | 0.000               | 0.000               | 2.556               | 2.434               |

### Equilibrium price vector

| Receptor Point $j$ | $p_j^{1*}$ | $p_j^{2*}$ |
|--------------------|------------|------------|
| 1                  | 7.461      | 7.271      |
| 2                  | 7.540      | 7.820      |
| 3                  | 6.556      | 4.755      |
